# Supplementary material for: Enhanced Myc Expression in Silkworm Silk Gland Promotes DNA Replication and Silk Production
Source: MDPI journal article supplement (doi:10.3390/insects12040361), 2021-04-18

Supplementary Table S1. The primers used in this study

| Purpose                             | Primer name          | Primer sequence                                                                                  |
|-------------------------------------|----------------------|--------------------------------------------------------------------------------------------------|
| Construction of recombinant plasmid | <i>FibH</i> promoter | Forward: 5' CCGCTCGAGTAATTAGGTAGTGTTTAAGCTTGTTG 3'<br>Reverse: 5' GGACTAGTGAGAGTTGGAACCGAACTG 3' |
|                                     | <i>Myc</i> ORF       | Forward: 5' CTAGACTAGTATGTCGCCGCCGCTAGA 3'<br>Reverse: 5' CGCGGATCCTCAGTACGGGTGGTAGCGA 3'        |
|                                     | <i>Ser-PA</i>        | Forward: 5' CGCGGATCCTACAATAACACGACTTGGAGT 3'<br>Reverse: 5' CGACGCGTTTCGTCAATGTATCAGTTTTGGT 3'  |
|                                     |                      |                                                                                                  |
|                                     |                      |                                                                                                  |
|                                     |                      |                                                                                                  |
| RT-qPCR                             | <i>MCM2</i>          | Forward: 5' GATGAAAATGCCGATGCC 3'<br>Reverse: 5' AACTCAACATGAAAGGATGC 3'                         |
|                                     | <i>MCM3</i>          | Forward: 5' CAGCCGAATCCATTTACG 3'<br>Reverse: 5' CTTGCCATGTCGCTATCC 3'                           |
|                                     | <i>MCM4</i>          | Forward: 5' TGATATAAGTCTGATGCGGGA 3'<br>Reverse: 5' AGTTCAACAACGGAAGAAAGTC 3'                    |
|                                     | <i>MCM5</i>          | Forward: 5' GTTTTGGCTGATGGTGGT 3'<br>Reverse: 5' CGAGAATTTAATGTAGTGGTGA 3'                       |
|                                     | <i>MCM6</i>          | Forward: 5' AGATACGAATCCAGGAAACCC 3'<br>Reverse: 5' CACATCAGGCACTACAATCAG 3'                     |
|                                     | <i>MCM7</i>          | Forward: 5' TAGTCTTGCCCCCGAAAT 3'<br>Reverse: 5' CAAAACAGCAGCAGTGAGG 3'                          |
|                                     | <i>FibH</i>          | Forward: 5' TCTGTGTCATCTGCTTCATCTCG 3'<br>Reverse: 5' TATCCAGGACGAAGTAAGAAACAA 3'                |
|                                     | <i>Ser1</i>          | Forward: 5' CACAACCGATAAGACGAG 3'<br>Reverse: 5' GACGAAGTGGAGGAAGC 3'                            |
|                                     | <i>FibL</i>          | Forward: 5' ATACCGATTGGTCACATAACAG 3'                                                            |
|                                     |                      |                                                                                                  |
|                                     |                      |                                                                                                  |
|                                     |                      |                                                                                                  |
|                                     |                      |                                                                                                  |
|                                     |                      |                                                                                                  |

*P25*

Reverse: 5' GCAGATAGATGGGCGATAA 3'

Forward: 5' AGCCGCTGTGGCAGTTTTG 3'

Reverse: 5' TAGGTGGCGTTGAAGTATGG 3'

**Figure S1.** Effect of PSG-specific Myc overexpression on the transcription of *FibL* and *P25* genes. *Myc* overexpression in the PSG had no effect on the transcription of *FibL* (A) and *P25* (B) genes

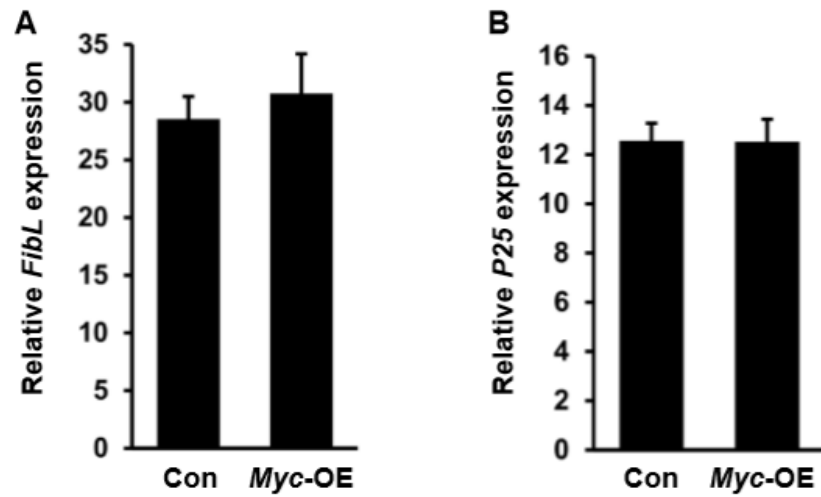

Supplement: s1 [file s1]
